# Supplementary material for: The Effects of Dietary Manganese and Selenium on Growth and the Fecal Microbiota of Nursery Piglets
Source: MDPI journal article supplement (doi:10.3390/vetsci10110650), 2023-11-10
Supplement: s1 [file s1]

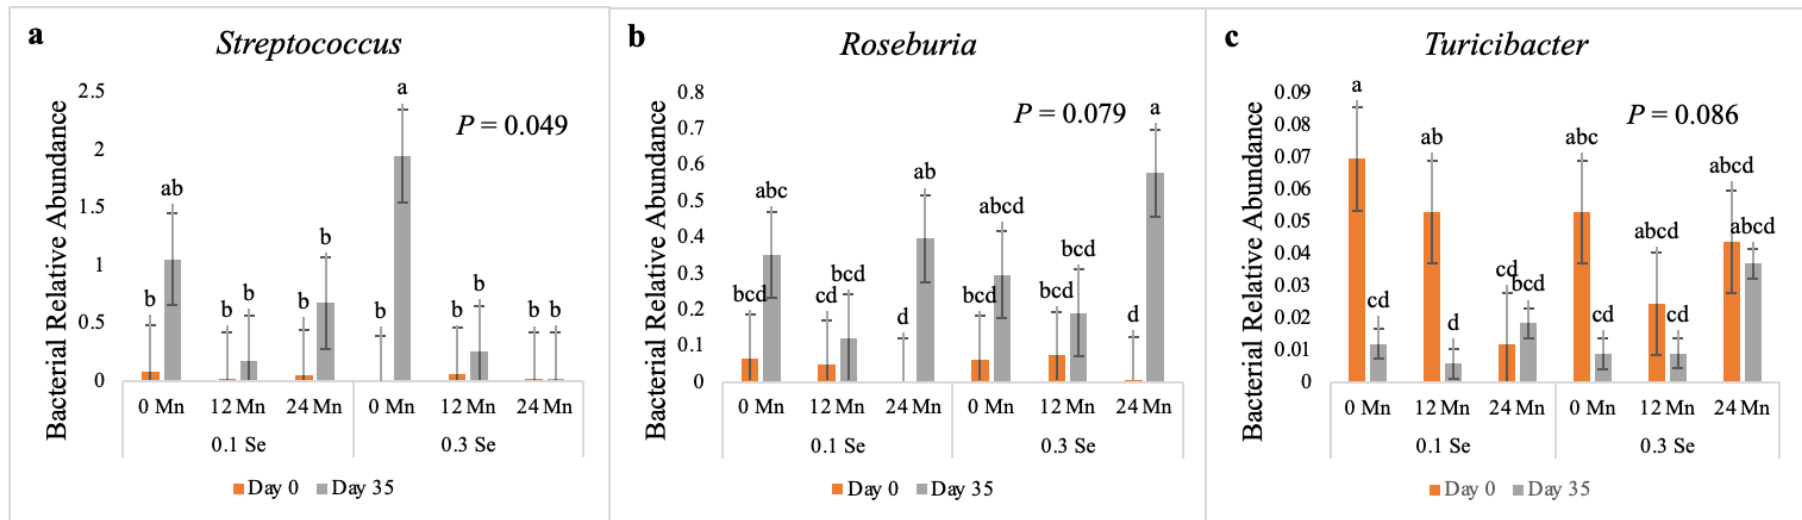

**Supplemental FigureS1.** The effect of varying dietary manganese and selenium on bacterial relative abundance for the genera *Streptococcus* (a), *Roseburia* (b), and *Turicibacter* (c) in nursery pigs (n = 30 pens).  $P$  values reported for MnXDay effect. <sup>abcd</sup> indicates significant differences ( $P < 0.05$ ).
